# Supplementary material for: Significantly improved Li-ion diffusion kinetics and reversibility of Li2O in a MoO2 anode: the effects of oxygen vacancy-induced local charge distribution and metal catalysis on lithium storage
Source: Royal Society of Chemistry journal article supplement (doi:10.1039/c9ta04774c), 2019-01-01
Supplement: c9ta04774c1.pdf [file c9ta04774c1.pdf]

## **Electronic Supplementary Information (ESI)**

### **Significantly Improved Li-Ion Diffusion Kinetics and Reversibility of Li<sub>2</sub>O in MoO<sub>2</sub> Anode: the Effects of Oxygen Vacancy-Induced Local Charge Distribution and Metal Catalysis on Lithium Storage**

Tao Meng<sup>a</sup>, Jinwen Qin<sup>a</sup>, Zhen Yang<sup>a</sup>, Lirong Zheng<sup>b</sup>, and Minhua Cao<sup>a,\*</sup>

<sup>a</sup>Key Laboratory of Cluster Science, Ministry of Education of China, Beijing Key Laboratory of Photoelectronic/Electrophotonic Conversion Materials, School of Chemistry and Chemical Engineering, Beijing Institute of Technology, Beijing 100081, P. R. China.

<sup>b</sup>Beijing Synchrotron Radiation Laboratory, Institute of High Energy Physics, Chinese Academy of Sciences, Beijing 100049, P. R. China.

\* E-mail: caomh@bit.edu.cn

## 1 Characterizations

Powder X-ray diffraction (XRD) analysis was performed on a Bruker D8 Advance diffractometer (Cu-K $\alpha$ ,  $\lambda \approx 0.154$ ). Field emission scanning electron microscopy (FE-SEM) and transmission electron microscopy (TEM) measurements were performed on HITACHI S-4800 and JEOL JEM-2010 microscope, respectively. Energy dispersive spectroscopy (EDS) element mapping images were taken on TEM. Thermogravimetric analysis (TGA) was performed on a Rigaku thermogravimetry (TG) analyser in air. Raman spectra were collected on an Invia Raman spectrometer with the excitation laser wavelength of 633 nm. The Belsorp-max sorption analyzer was used to collect the N<sub>2</sub> adsorption-desorption isotherms at liquid nitrogen temperature (77 K). Before measurement, the sample was degassed at 200 °C for 3 h. Surface area was calculated by the multi-point Brunauer-Emmett-Teller (BET) method. The pore-size distribution was calculated from the adsorption branch using the Barrett-Joyner-Halenda (BJH) method. X-ray spectroscopy (XPS) was performed on the ESCALAB 250 spectrometer (Perkin-Elmer). The Jobin Yvon Fluorolog 3-TAU luminescence spectrometer with a 450-W Xe lamp was employed to obtain the photoluminescence (PL) spectra. Room-temperature electron spin resonance (ESR) spectra were obtained using a JEOL JES-FA200 ESR spectrometer (300 K, 9.062 GHz). The content of molybdenum element was determined by inductively coupled plasma mass spectroscopy (ICP-MS) analysis (Thermo Fisher Scientific, U.S.). The X-ray absorption near edge structure (XANES) measurement was undertaken at Beamlines 1W1B at Beijing Synchrotron Radiation Facility (BSRF) using transmission modes.

## 2. Lithium-ion battery measurements

To prepare the working electrode for LIBs, the as-obtained material, acetylene black, and sodium carboxymethyl cellulose binder (CMC) with a mass ratio of 8:1:1 were firstly mixed together by trace water to form a homogeneous slurry, which then was coated onto Cu foil and dried at 120 °C for 36 h in vacuum oven. The mass loading of each as-prepared working electrode was around 1 mg. The cell [coin cells (CR2025)] assembly was operated in an Ar-filled glovebox. The Celgard 2400 microporous S-2

polypropylene membrane and Li foil were used as the separator and the counter electrode, respectively. The non-aqueous electrolyte used was 1 M LiPF<sub>6</sub> dissolved in ethylene carbonate (EC)/dimethyl carbonate (DMC)/diethyl carbonate (DEC) mixture (1:1:1, in vol. %). The cyclic voltammetry (CV) tests were carried out at scan rates ranging from 0.1 to 3 mV s<sup>-1</sup> on a CHI-760E workstation. Galvanostatic cycling experiments of the cell were performed on a LAND CT2001A cell at different current densities in the voltage range of 0.01-3.00 V vs. Li<sup>+</sup>/Li at room temperature. Electrochemical impedance spectroscopy (EIS) measurements were recorded in a frequency range of 100,000 to 0.01 Hz with AC oscillation of 5 mV at the open circuit voltage.

### 3. Supplementary figures

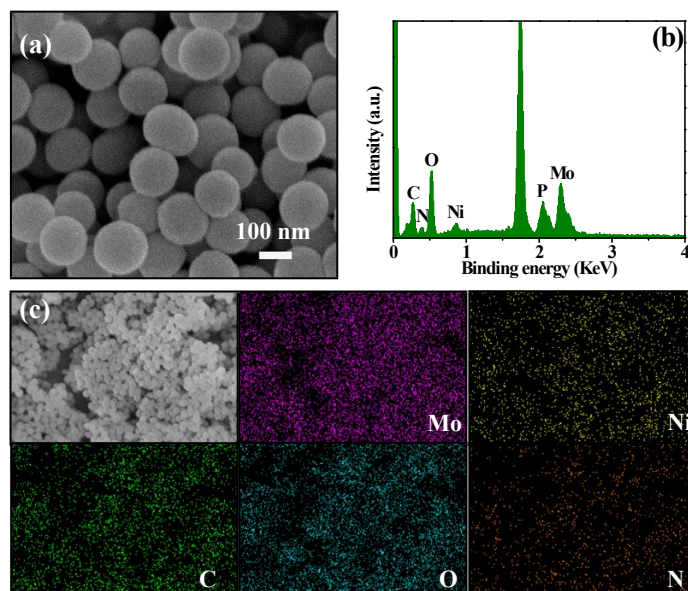

**Fig. S1** (a) FESEM image, (b) energy-dispersive spectroscopy (EDS) spectrum and (c) corresponding element mappings over a widespread region of Ni,Mo-precursor.

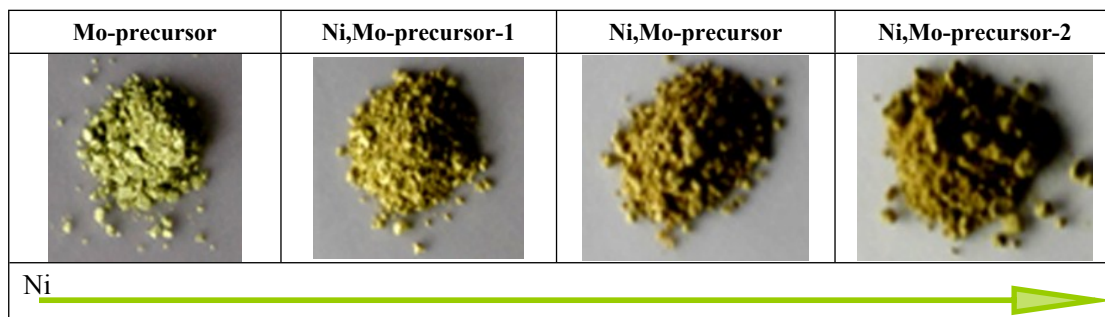

**Fig. S2** Digital photographs of Ni,Mo-precursor with different Ni species, and corresponding color change of the products.

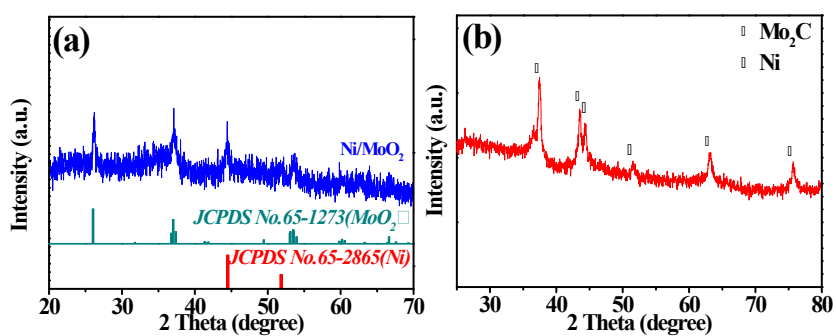

**Fig. S3** XRD patterns of (a) Ni/MoO<sub>2</sub> and (b) Ni/Mo<sub>2</sub>C.

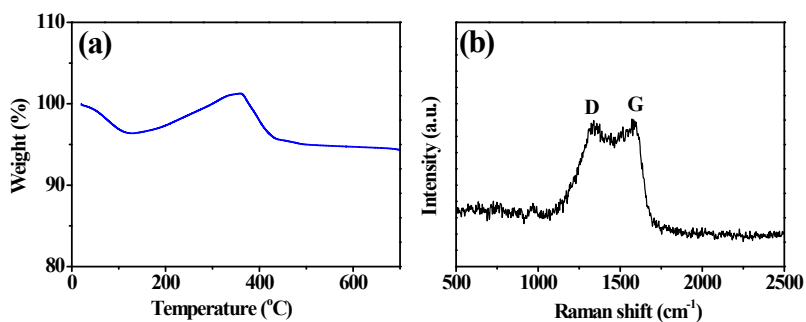

**Fig. S4** TGA curve (a) and Raman spectrum (b) for Ni/MoO<sub>2- $\delta$</sub>

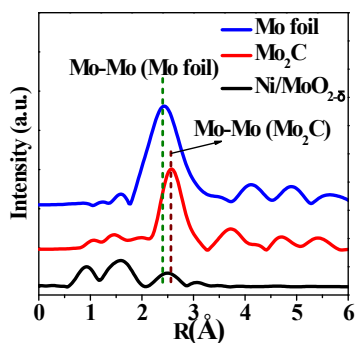

**Fig. S5** Fourier transform  $k^3$ -weighted EXAFS spectra of Ni/MoO<sub>2-δ</sub>, Mo<sub>2</sub>C and Mo foil.

The R space of 1.55 Å for Ni/MoO<sub>2-δ</sub> corresponds to the Mo-O bond, which is also similar with that of MoO<sub>2</sub>. The weak peak at the R space of 2.51 Å in Ni/MoO<sub>2-δ</sub> can be ascribed to the Mo-Mo bond in Mo<sub>2</sub>C species (Fig. S5). From this result we also deduce that a little Mo<sub>2</sub>C has been formed existing in Ni/MoO<sub>2-δ</sub> sample during the heat treatment process. In fact, MoO<sub>2-δ</sub> can be completely transformed into Mo<sub>2</sub>C by prolonging the annealing time (Fig. 1h and Fig. S3b).

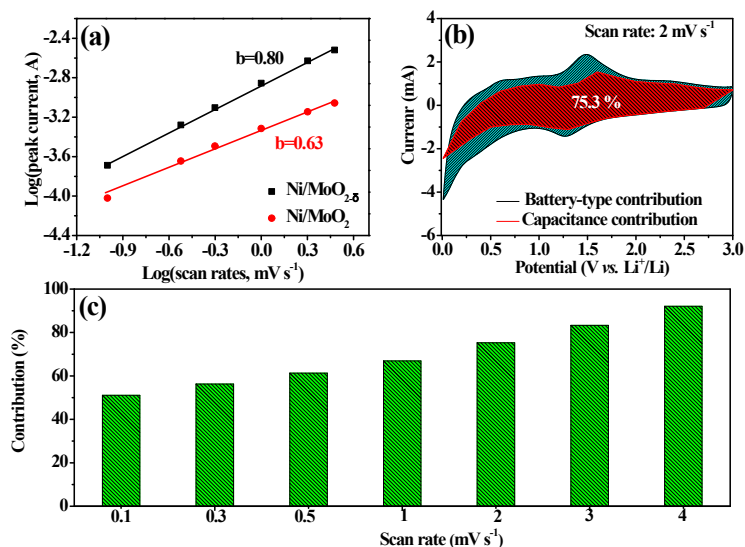

**Fig. S6** (a) Current response vs. the scan rate for Ni/MoO<sub>2-δ</sub> and Ni/MoO<sub>2</sub>. (b) The capacitive contribution to charge storage of Ni/MoO<sub>2-δ</sub> at 2 mV s<sup>-1</sup>. (c) The percentage of capacitance contribution of Ni/MoO<sub>2-δ</sub> at different scan rates.

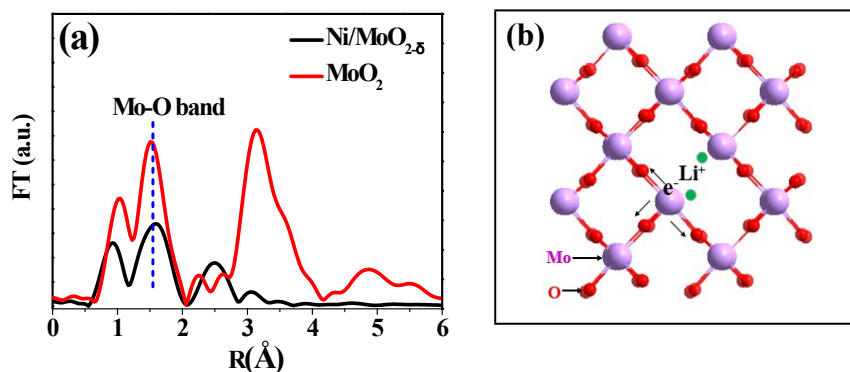

**Fig. S7** (a) Fourier transform  $k^3$ -weighted EXAFS spectra of Ni/MoO<sub>2- $\delta$</sub>  and MoO<sub>2</sub>. (b) The proposed lithium storage mechanism of MoO<sub>2- $\delta$</sub>  around the oxygen vacancy region.

**Fig. S7a** shows the Fourier-transformed  $k^3$ -weighted EXAFS spectra, and the peak at around 1.55 Å observed in both samples can be assigned to the representative Mo-O bond. Clearly, this peak for Ni/MoO<sub>2- $\delta$</sub>  is obviously weaker than that for the bare MoO<sub>2</sub>, indicating that the coordination number of Mo-O decreases, and meanwhile, the disorder degree significantly increases. The decreased Mo-O coordination can lead to many Mo dangling bonds (unoccupied electron) around the oxygen vacancy region, which can act as extra active sites to harvest the lithium species *via* electrostatic attraction (**Fig. S7b**).

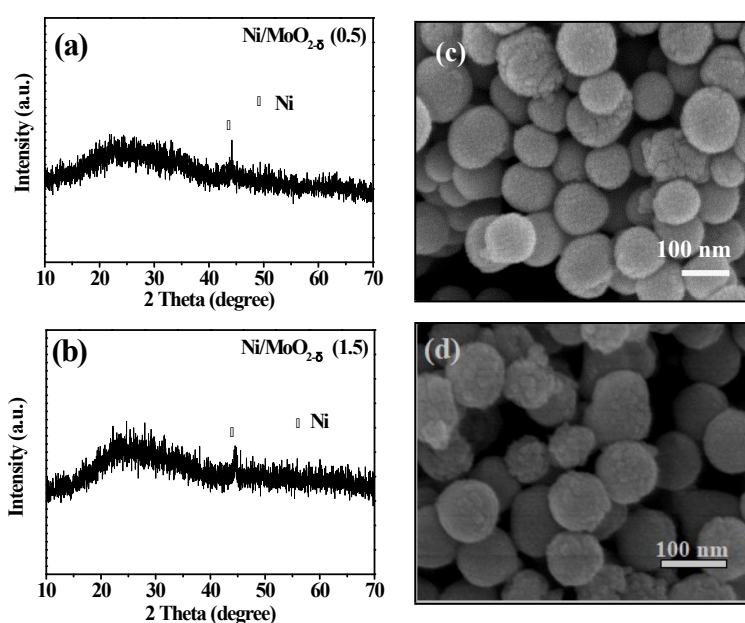

**Fig. S8** XRD patterns and FESEM images of Ni/MoO<sub>2- $\delta$</sub> -1 (a,c) and Ni/MoO<sub>2- $\delta$</sub> -2 (b,d).

**Table S1** the molar ratios of Ni/Mo in series Ni/MoO<sub>2-δ</sub> samples by ICP-MS.

| Samples                       | Molar ratio of Ni/Mo |
|-------------------------------|----------------------|
| Ni/MoO <sub>2-δ</sub> -1(0.5) | 1:7.32               |
| Ni/MoO <sub>2-δ</sub> (1.0)   | 1:5.23               |
| Ni/MoO <sub>2-δ</sub> -2(1.5) | 1:4.15               |

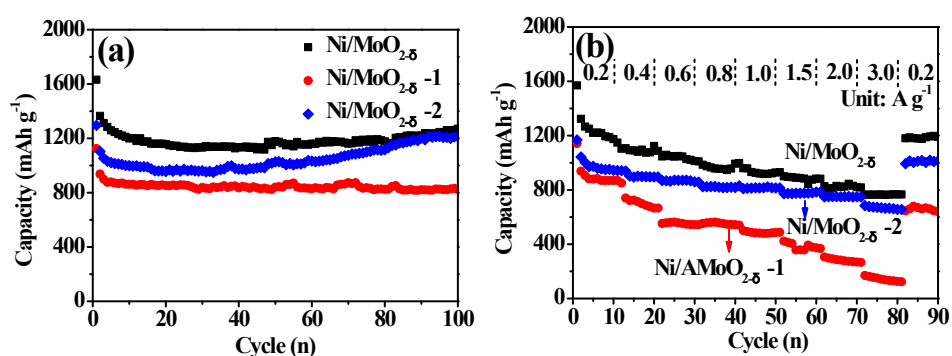

**Fig. S9** (a) Cycling performances tested at the current density of 0.2 A g<sup>-1</sup> and (b) rate performances of Ni/MoO<sub>2-δ</sub>-1, Ni/MoO<sub>2-δ</sub>, and Ni/MoO<sub>2-δ</sub>-2.

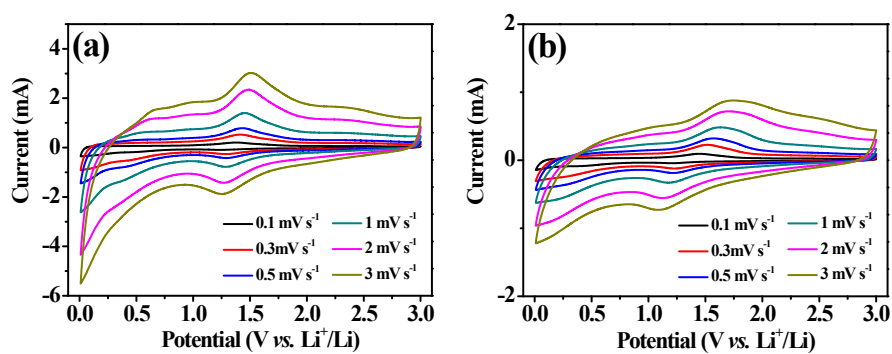

**Fig. S10** CVs of Ni/MoO<sub>2-δ</sub> (a) and Ni/MoO<sub>2</sub> (b) at different scan rates.

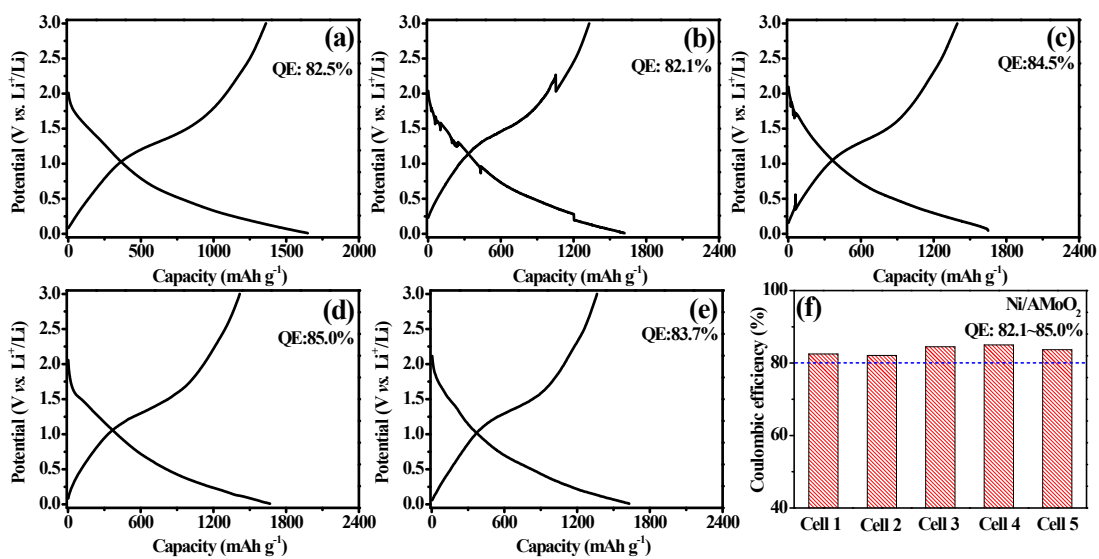

**Fig. S11** The first discharge/charge voltage profiles (a-e) and initial Coulombic efficiencies (f) for five different cells based on Ni/MoO<sub>2-δ</sub> at a rate of 0.2 A g<sup>-1</sup>.

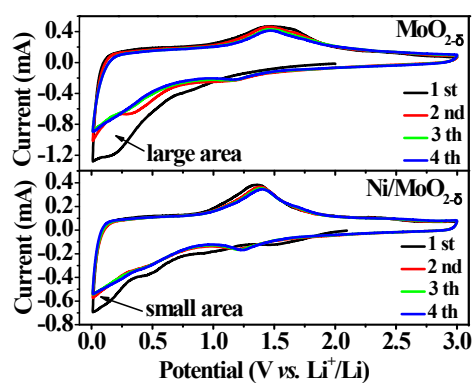

**Fig. S12** CV curves of Ni/MoO<sub>2-δ</sub> and MoO<sub>2-δ</sub>.
